# Supplementary material for: Rational Combinations of Targeted Therapy and Immune Checkpoint Inhibitors in Head and Neck Cancers
Source: Front Oncol. 2022 Mar 17;12:837835. doi: 10.3389/fonc.2022.837835 (PMC8968950; doi:10.3389/fonc.2022.837835)
Supplement: Supplementary file 2 [file Table_1.xls]

## Sheet: Sheet1
Supplementary Table 1 - Detailed summary of clinical trials in HNC that involved combination of targeted therapy and ICIs.
Drug target	Targeted Drug Name	ICI	NCT number	Title	Status	Phase	Results	Summary of results / reason for terminated trial	Biomarkers under investigation
EGFR	Cetuximab	Pembrolizumab	NCT03082534	Pembrolizumab Combined With Cetuximab for Treatment of Recurrent/Metastatic Head & Neck Squamous Cell Carcinoma	Recruiting	Phase 2	No Results Available		PD-L1, EGFR expression, p16 status, EBV plasma DNA titres
		Nivolumab	NCT02764593	Safety Testing of Adding Nivolumab to Chemotherapy in Patients With Intermediate and High-Risk Local-Regionally Advanced Head and Neck Cancer	Active, not recruiting	Phase 1	No Results Available		-
		Nivolumab	NCT02124850	A Phase Ib Study of Neoadjuvant of Cetuximab Plus Motolimod and Cetuximab Plus Motolimod Plus Nivolumab	Terminated	Phase 1	No Results Available	Did not proceed with combination arm, main test agent was TLR8 agonist	NK activation, tumor infiltration, serum cytokines, mDC, T ell activation, tumor-antigen specific cytotoxic T lymphocyte induction
		Nivolumab	NCT03370276	Cetuximab & Nivolumab in Patients With Recurrent/Metastatic Head & Neck Squamous Cell Carcinoma	Active, not recruiting	Phase 1|Phase 2	No Results Available		-
	Afatinib	Pembrolizumab	NCT03695510	Afatinib and Pembrolizumab for Head and Neck Squamous Cell Carcinoma (ALPHA Study)	Active, not recruiting	Phase 2	No Results Available		Unaltered MTAP level, EGFR amplification, PD-L1 expression
		Nivolumab	NCT03652233	Afatinib and Nivolumab as Treatment for Recurrent/Metastatic Squamous Cell Carcinoma of the Head and Neck	Withdrawn	Phase 1	No Results Available	"Low accural"	HPV status, somatic mutations in ERBB1, ERBB2, BRAF; expression levels of ErbB2 and PTEN, active CD8+ T cell density, expression and localization of PD-1, PD-L1, CTLA-4, TIM-3, LAG-3, OX40; circulating monocytic MDSCs, HBD3 expression
	MVC-101 (TAK-186)	Nivolumab	NCT04891718	Phase 0 Australia Master Protocol for CIVO Intratumoural Microdosing of Anti-Cancer Therapies	Not yet recruiting	Early Phase 1	No Results Available		Cell death markers, T-cells , NK cells/myeloid cells, proinflammatory cytokines
EGFR and TGF-β	BCA-101	Pembrolizumab	NCT04429542	Study of Safety and Tolerability of BCA101 Alone and in Combination With Pembrolizumab in Patients With EGFR-driven Advanced Solid Tumors	Recruiting	Phase 1	No Results Available		-
RTK	Lenvatinib (E7080/MK-7902)	Pembrolizumab	NCT04428151	Lenvatinib (E7080/MK-7902) in Combination With Pembrolizumab (MK-3475) vs. Standard Chemotherapy and Lenvatinib Monotherapy in Participants With Recurrent/Metastatic Head and Neck Squamous Cell Carcinoma That Progressed After Platinum Therapy and Immunotherapy (MK-7902-009/E7080-G000-228/LEAP-009)	Recruiting	Phase 2	No Results Available		-
		Pembrolizumab	NCT04199104	A Study of Pembrolizumab (MK-3475) With or Without Lenvatinib (E7080/MK-7902) as First Line (1L) Intervention in a Programmed Cell Death-ligand 1 (PD-L1) Selected Population With Recurrent or Metastatic Head and Neck Squamous Cell Carcinoma (R/M HNSCC) (LEAP-010) (MK-7902-010)	Recruiting	Phase 3	No Results Available		-
	Cabozantinib	Pembrolizumab	NCT03468218	Pembrolizumab & Cabozantinib in Patients With Head and Neck Squamous Cell Cancer	Recruiting	Phase 2	No Results Available		-
		Nivolumab	NCT04514484	Testing the Combination of the Anti-cancer Drugs XL184 (Cabozantinib) and Nivolumab in Patients With Advanced Cancer and HIV	Recruiting	Phase 1	No Results Available		Immune checkpoint expression (PD-L1, B7x, HHLA2, B7H3), infiltrating immune cells level, tumor microenvironment biomarkers (VEGF, VEGFR, MET, AXL)
		Atezolizumab	NCT03170960	Study of Cabozantinib in Combination With Atezolizumab to Subjects With Locally Advanced or Metastatic Solid Tumors	Recruiting	Phase 1|Phase 2	No Results Available		-
	Anlotinib	Pembrolizumab	NCT04999800	Study of Pembrolizumab Combined With Anlotinib in the First Line Therapy for R/M HNSCC With CPS ≥ 1	Recruiting	Phase 2	No Results Available		TMB, T cell gene expression
	Pexidartinib (PLX3397)	Pembrolizumab	NCT02452424	A Combination Clinical Study of PLX3397 and Pembrolizumab To Treat Advanced Melanoma and Other Solid Tumors	Terminated	Phase 1|Phase 2	Has Results	"Insufficient evidence of clinical efficacy"	-
	Ramucirumab (Cyramza)	Pembrolizumab	NCT03650764	Ramucirumab + Pembrolizumab in Patients With Recurrent/Metastatic Head and Neck Squamous Cell Carcinoma	Active, not recruiting	Phase 1|Phase 2	No Results Available		-
	Sitravatinib (MGCD516)	Nivolumab	NCT03575598	Sitravatinib (MGCD516) and Nivolumab in Oral Cavity Cancer Window Opportunity Study	Completed	Early Phase 1	Has Results	Nine of ten patients showed clinical-to-pathological downstaging	Tumor PD-L1 expression, density of immune cell in tumor and peripheral blood (T-cells, NK cells, myeloid-derived cells)
PI3K	Duvelisib	Pembrolizumab	NCT04193293	A Study of Duvelisib in Combination With Pembrolizumab in Head and Neck Cancer	Suspended	Phase 1|Phase 2	No Results Available	"Patient recruitment issue"	-
	Copanlisib	Nivolumab	NCT03735628	An Study to Evaluate the Safety and Efficacy of Copanlisib in Combination With Nivolumab in Patients With Advanced Solid Tumors	Active, not recruiting	Phase 1b|Phase 2	No Results Available		-
	Eganelisib (IPI-549)	Nivolumab	NCT02637531	A Dose-Escalation Study to Evaluate the Safety, Tolerability, Pharmacokinetics, and Pharmacodynamics of IPI-549	Active, not recruiting	Phase 1	No Results Available		-
JAK1 and PI3K-delta	Itacitinib (INCB039110) and INCB050465	Pembrolizumab	NCT02646748	Pembrolizumab Combined With Itacitinib (INCB039110) and/or Pembrolizumab Combined With INCB050465 in Advanced Solid Tumors	Active, not recruiting	Phase 1	No Results Available		-
STAT3	Danvartirsan (AZD9150)	Durvalumab	NCT02499328	Study to Assess MEDI4736 With Either AZD9150 or AZD5069 in Advanced Solid Tumors & Relapsed Metastatic Squamous Cell Carcinoma of Head & Neck	Active, not recruiting	Phase 2	No Results Available		PD-L1 expression
CDK4/6	Abemaciclib	Pembrolizumab	NCT03938337	Abemaciclib and Pembrolizumab in Metastatic or Recurrent Head and Neck Cancer	Terminated	Phase 2	Has Results	"High incidence of pulmonary toxicity than expected, including death"	-
		Nivolumab	NCT03655444	Abemaciclib + Nivolumab in Patients With Recurrent/Metastatic Head and Neck Squamous Cell Carcinoma That Progressed or Recurred Within Six Months After Platinum-based Chemotherapy	Terminated	Phase 1|Phase 2	Has Results	"Provider of drug decided to discontinue study"	-
TGF-beta	Bintrafusp alfa (M7824 / MSB0011359C)	anti-PDL1	NCT02517398	MSB0011359C (M7824) in Metastatic or Locally Advanced Solid Tumors	Active, not recruiting	Phase 1	No Results Available		HPV status
		anti-PDL1	NCT03427411	M7824 in Subjects With HPV Associated Malignancies	Active, not recruiting	Phase 2	No Results Available
BTK	Acalabrutinib (ACP-196)	Pembrolizumab	NCT02454179	Study of the Combination of Acalabrutinib (ACP-196) and Pembrolizumab in Advanced Head and Neck Squamous Cell Carcinoma	Completed	Phase 2	Has Results	All patients discontinued, serious adverse event is higher (68% vs 31%) and overall response (16.7% vs 18.9%) is lower than that of pembrolizumab monotherapy.	-
	Ibrutinib	Nivolumab	NCT03646461	Trial of Ibrutinib Combined With Nivolumab or Cetuximab to Treat Recurrent/Metastatic HNSCC	Recruiting	Phase 2	No Results Available		HPV status
HDAC	Abexinostat	Pembrolizumab	NCT03590054	A Phase 1b Dose Escalation/Expansion Study of Abexinostat in Combination With Pembrolizumab in Patients With Advanced Solid Tumor Malignancies	Recruiting	Phase 1	No Results Available		-
	Vorinostat	Pembrolizumab	NCT04357873	Efficacy of Immunotherapy Plus a Drug in Patients With Progressive Advanced Mucosal Cancer of Different Locations	Recruiting	Phase 2	No Results Available		-
		Pembrolizumab	NCT02538510	Pembrolizumab and Vorinostat in Treating Patients With Recurrent Squamous Cell Head and Neck Cancer or Salivary Gland Cancer That Is Metastatic and/or Cannot Be Removed by Surgery	Active, not recruiting	Phase 1|Phase 2	Has Results	38% (8/21) partial response, 38% (8/21) stable disease	PD-L1 expression, T cell phenotype, PD-1 family proteins expression
p53	Ad-p53	Pembrolizumab or Nivolumab	NCT02842125	Safety and Efficacy of Intra-Arterial and Intra-Tumoral Ad-p53 With Capecitabine (Xeloda) or Anti-PD-1 in Liver Metastases of Solid Tumors and Recurrent Head and Neck Squamous Cell Cancer	Terminated	Phase 1|Phase 2	No Results Available		-
		Pembrolizumab/Nivolumab/Atezolizumab/Durvalumab	NCT03544723	Safety and Efficacy of p53 Gene Therapy Combined With Immune Checkpoint Inhibitors in Solid Tumors.	Recruiting	Phase 2	No Results Available		-
Galectin-3	GR-MD-02	Pembrolizumab	NCT04987996	GR-MD-02 + Pembrolizumab Versus Pembrolizumab Monotherapy in Melanoma and Squamous Cell Head and Neck Cancer Patients	Not yet recruiting	Phase 2	No Results Available		GAL-3 expression, MDSC expression
		Pembrolizumab	NCT02575404	GR-MD-02 Plus Pembrolizumab in Melanoma, Non-small Cell Lung Cancer, and Squamous Cell Head and Neck Cancer Patients	Active, not recruiting	Phase 1	No Results Available		CD4+ T cells, CD8+ T cells level
AURKA	Alisertib	Pembrolizumab	NCT04555837	Alisertib and Pembrolizumab for the Treatment of Patients With Rb-deficient Head and Neck Squamous Cell Cancer	Recruiting	Phase 1|Phase 2	No Results Available		T-cell repertoire, tumor infiltrating lymphocyte function
CXCR4	AMD3100	Pembrolizumab	NCT04058145	AMD3100 Plus Pembrolizumab in Immune Checkpoint Blockade Refractory Head and Neck Squamous Cell Carcinoma	Withdrawn	Phase 2	No Results Available	"Funding Withdrawn"	-
SMO	Sonidegib	Pembrolizumab	NCT04007744	Sonidegib and Pembrolizumab in Treating Patients With Advanced Solid Tumors	Recruiting	Phase 1	No Results Available		Immune cell markers, cytokines and soluble PD-L1 levels, level of Bcl-2 interacting mediator of cell death (BIM)
ATR	Elimusertib (BAY1895344)	Pembrolizumab	NCT04576091	Testing the Addition of an Anti-cancer Drug, BAY1895344, With Radiation Therapy to the Usual Pembrolizumab Treatment for Recurrent Head and Neck Cancer	Suspended	Phase 1	No Results Available	"Resource allocation evaluation"	TMB, circulating Ki67+ CD8+ T cells
PDE5	Tadalafil	Pembrolizumab	NCT03993353	Tadalafil and Pembrolizumab in Recurrent or Metastatic Head and Neck Cancer	Recruiting	Phase 2	No Results Available		-
FUT8	SGN-2FF	Pembrolizumab	NCT02952989	A Safety Study of SGN-2FF for Patients With Advanced Solid Tumors	Terminated	Phase 1	No Results Available	"Due to overall benefit/risk profile"	Fucosylation biomarker
PARP	Olaparib	Pembrolizumab	NCT04643379	Olaparib in Combination With Pembrolizumab and Carboplatin as First-Line Treatment of Recurrent or Metastatic Head and Neck Squamous-Cell Carcinoma	Recruiting	Phase 2	No Results Available		-
EZH2	Tazemetostat	Pembrolizumab	NCT04624113	Tazemetostat and Pembrolizumab in Patients With Pembrolizumab- or Nivolumab-Resistant, Recurrent or Metastatic Head and Neck Squamous-Cell Carcinoma	Recruiting	Phase 1|Phase 2	No Results Available		-
Arginase	INCB001158 (CB-1158)	Pembrolizumab	NCT02903914	Arginase Inhibitor INCB001158 as a Single Agent and in Combination With Immune Checkpoint Therapy in Patients With Advanced/Metastatic Solid Tumors	Active, not recruiting	Phase 1|Phase 2	No Results Available		-
SYK/FLT3	TAK-659	Nivolumab	NCT02834247	A Study of TAK-659 in Combination With Nivolumab in Participants With Advanced Solid Tumors	Terminated	Phase 1	Has Results	"Insufficient efficacy of drug; no safety concern"	-
PPARα	TPST-1120	Nivolumab	NCT03829436	TPST-1120 as Monotherapy and in Combination With Nivolumab in Subjects With Advanced Cancers	Recruiting	Phase 1	No Results Available		-
VEGF	Bevacizumab	Atezolizumab	NCT03818061	Atezolizumab and Bevacizumab in Patients With Recurrent or Metastatic Squamous-cell Carcinoma of the Head and Neck (ATHENA)	Active, not recruiting	Phase 2	No Results Available		HPV status, PD-1/PD-L1 expression, immune cells infiltration, cytokine production, microbiome
PTPN2	ABBV-CLS-579	anti-PD1	NCT04417465	First In Human Study With ABBV-CLS-579 When Given Alone Or In Combination With Programmed Cell Death-1 Inhibitor In Participants With Locally Advanced Or Metastatic Tumors	Recruiting	Phase 1	No Results Available		Plasma/Serum metabolite M4 concentration
	ABBV-CLC-484	anti-PD1	NCT04777994	A Phase 1 Study With ABBV-CLS-484 in Subjects With Locally Advanced or Metastatic Tumors	Recruiting	Phase 1	No Results Available		-
